# Supplementary material for: Association of domain-specific physical activity with nocturia: a population- based study
Source: Research Square preprint supplement (doi:10.21203/rs.3.rs-5275372/v1), 2024-11-20
Supplement: Supplementary file 1 [file 5dc757e719416fa6d05fa9bb.docx]

**Table S1** Characteristics of study population. in the propensity score matching.

| **Nocturia** | **No** | **Yes** | **All** |  |
| --- | --- | --- | --- | --- |
| **N** | 1593 | 1593 | 3186 |  |
| **Age(years)** | 53.47 ± 0.46 | 53.85 ± 0.49 | 53.65 ± 0.33 | |
| **OPA** | 565.77 ± 41.89 | 576.82 ± 45.48 | 570.93 ± 30.82 | |
| **TPA** | 89.25 ± 8.90 | 80.32 ± 8.07 | 85.08 ± 6.06 | |
| **LTPA** | 169.44 ± 11.44 | 151.08 ± 13.21 | 160.86 ± 8.68 | |
| **PA** | 824.46 ± 46.66 | 808.22 ± 48.96 | 816.88 ± 33.78 | |
| **Age, n (%)** |  |  |  |  |
| **20-50** | 539(33.84%) | 544(34.15%) | 1083(33.99%) | |
| **≥50** | 1054(66.16%) | 1049(65.85%) | 2103(66.01%) | |
| **Gender, n (%)** | |  |  |  |
| Female | 743 (46.64%) | 740 (46.45%) | 1483 (46.55%) | |
| Male | 850 (53.36%) | 853 (53.55%) | 1703 (53.45%) | |
| **Race, n (%)** | |  |  |  |
| Mexican American | 264 (16.57%) | 299 (18.77%) | 563 (17.67%) | |
| Other Hispanic | 179 (11.24%) | 195 (12.24%) | 374 (11.74%) | |
| Non-Hispanic White | 788 (49.47%) | 644 (40.43%) | 1432 (44.95%) | |
| Non-Hispanic Black | 253 (15.88%) | 370 (23.23%) | 623 (19.55%) | |
| Other Race - Including Multi-Racial | 109 (6.84%) | 85 (5.34%) | 194 (6.09%) | |
| **Education, n (%)** | |  |  |  |
| Less than high school | 565 (35.47%) | 616 (38.67%) | 1181 (37.07%) | |
| High school | 401 (25.17%) | 374 (23.48%) | 775 (24.33%) | |
| More than high school | 627 (39.36%) | 603 (37.85%) | 1230 (38.61%) | |
| **Marital status, n (%)** | |  |  |  |
| Widowed/Divorced/Separated/Never married | 696 (43.69%) | 709 (44.51%) | 1405 (44.10%) | |
| Married/Living with partner | 897 (56.31%) | 884 (55.49%) | 1781 (55.90%) | |
| **PIR, n (%)** |  |  |  |  |
| <1 | 438 (27.50%) | 465 (29.19%) | 903 (28.34%) | |
| 1-4 | 874 (54.87%) | 843 (52.92%) | 1717 (53.89%) | |
| >4 | 281 (17.64%) | 285 (17.89%) | 566 (17.77%) | |
| **Cotinine, n (%)** | |  |  |  |
| <0.015 | 353 (22.16%) | 357 (22.41%) | 710 (22.28%) | |
| 0.015-3 | 789 (49.53%) | 810 (50.85%) | 1599 (50.19%) | |
| >3 | 451 (28.31%) | 426 (26.74%) | 877 (27.53%) | |
| **Drink at least 12 drinks/year, n (%)** | | | |  |
| No | 484 (30.38%) | 496 (31.14%) | 980 (30.76%) | |
| Yes | 1109 (69.62%) | 1097 (68.86%) | 2206 (69.24%) | |
| **Diabetes history, n (%)** | | |  |  |
| No | 1095 (68.74%) | 1049 (65.85%) | 2144 (67.29%) | |
| Yes | 498 (31.26%) | 544 (34.15%) | 1042 (32.71%) | |
| **Hypertension history, n (%)** | | |  |  |
| No | 535 (33.58%) | 529 (33.21%) | 1064 (33.40%) | |
| Yes | 1058 (66.42%) | 1064 (66.79%) | 2122 (66.60%) | |
| **Hyperlipidemia history, n (%)** | | |  |  |
| No | 433 (27.18%) | 434 (27.24%) | 867 (27.21%) | |
| Yes | 1160 (72.82%) | 1159 (72.76%) | 2319 (72.79%) | |
